# Supplementary material for: The fixation of CO2 by epoxides over nickel-pyrazolate-based metal–organic frameworks
Source: Royal Society of Chemistry journal article supplement (doi:10.1039/d0nj03692g), 2020-01-01
Supplement: d0nj03692g1.pdf [file d0nj03692g1.pdf]

## Supporting Information

# Fixation of CO<sub>2</sub> by Epoxides over Nickel-Pyrazolate Based Metal-Organic Frameworks

Zheng Wang,<sup>\*a</sup> Qianjie Xie<sup>b</sup>, Yajun Wang,<sup>b</sup> Yu Shu,<sup>a</sup> Cong Li,<sup>b</sup> and Yehua Shen<sup>\*b</sup>

<sup>a</sup>College of Food Science and Engineering, Northwest University, 710069 Xi'an, Shaanxi, China.

<sup>b</sup>Key Laboratory of Synthetic and Natural Functional Molecule Chemistry of Ministry of Education, College of Chemistry and Materials Science, Northwest University, 710127 Xi'an, Shaanxi, China.

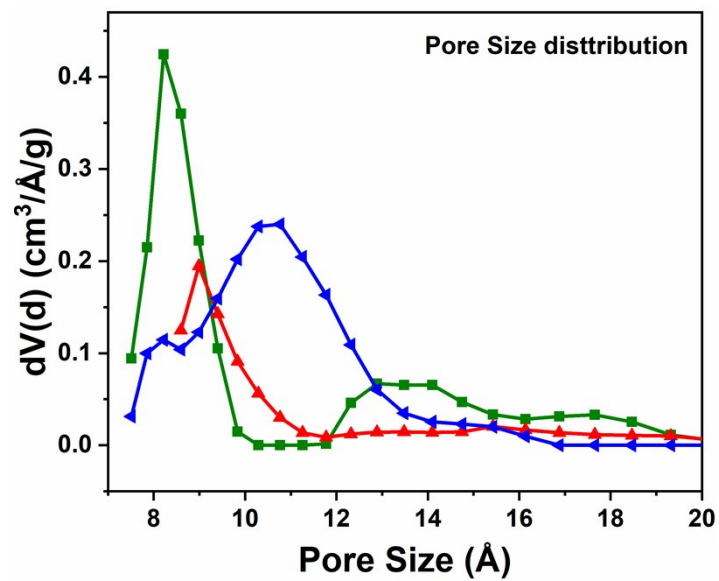

**Figure S1.** The pore size distribution of Nibdp (green), Nibdp-NO<sub>2</sub> (red) and Ni<sub>3</sub>btp<sub>2</sub> (blue).

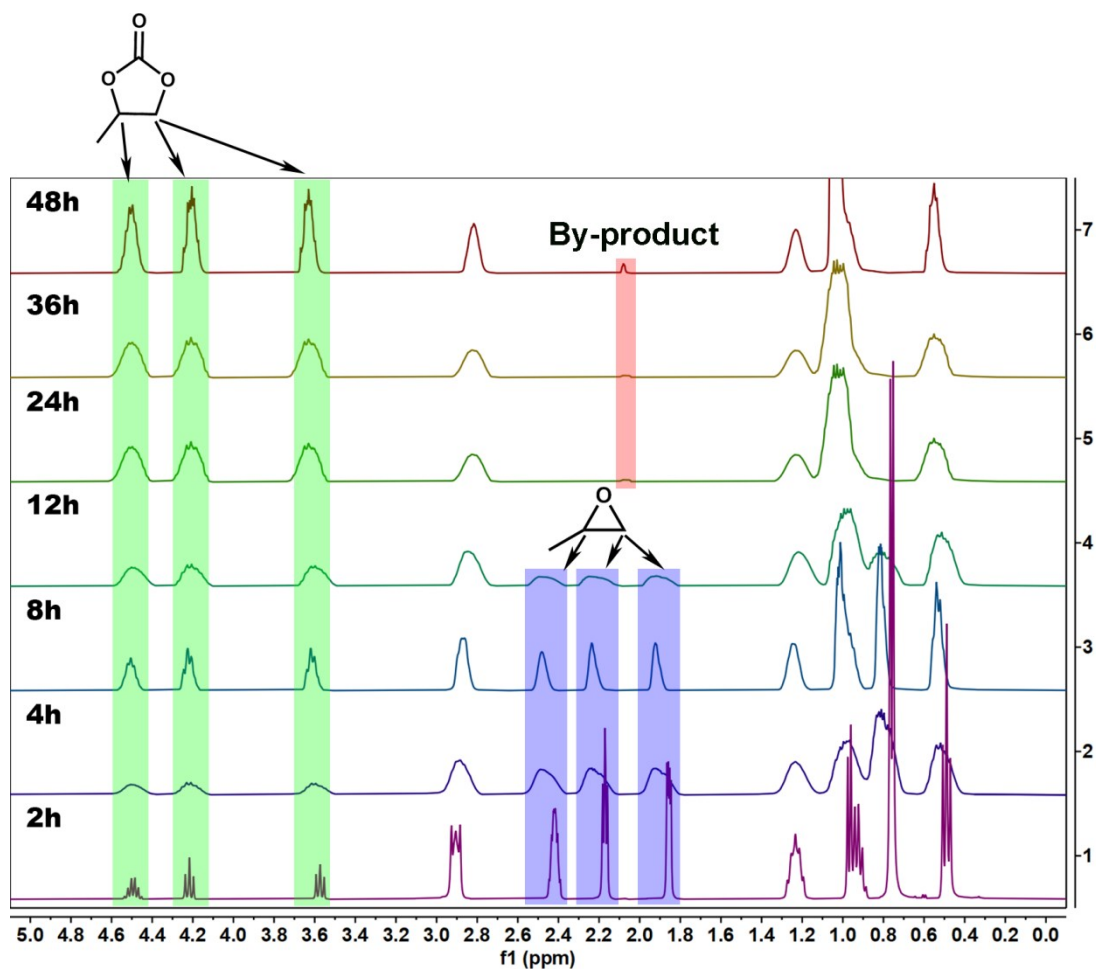

**Figure S2.** Conversion of propylene carbonate (PC) over Nibdp is followed using  $^1\text{H}$  NMR spectroscopy and the signals which are assigned to PC, PO and by-product are highlighted in green, blue bars and red, respectively. Signals are slightly shifted due to the presence of tetra-*n*-butylammonium bromide (TBAB). Note that, there is an additional peak appeared when the reaction processed more than 24 hours, which should be from side reaction. Reaction condition: (a) 1.05 ml PO, 5 bar  $\text{CO}_2$ , 0.405 g TBAB and  $80^\circ\text{C}$  and 20 mg Nibdp.

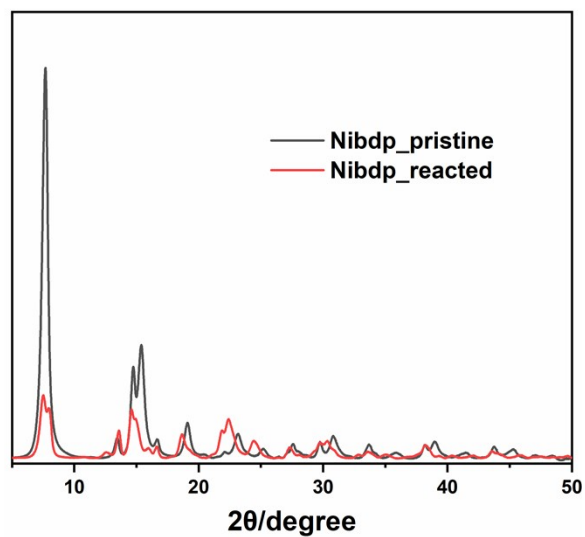

**Figure S3.** The comparative XRD patterns of pristine (black) and reused (red) Nibdp.
